**Plasma GPI and PGD are associated with vascular normalization and may serve as novel prognostic biomarkers for lung adenocarcinoma: Multi-omics and multi-dimensional analysis**

Yiran Liu<sup>1,\*</sup>, Yanchi Wang<sup>2,\*</sup>, Liping Mao<sup>2,\*</sup>, Yang Hu<sup>3</sup>, Rongrong Zhao<sup>4</sup>, Wendi Zhang<sup>1</sup>,  
Huiwen Xu<sup>1</sup>, Buyun Xu<sup>1</sup>, Yutong Wu<sup>1</sup>, Qiong Chen<sup>1</sup>, Xiaobo Tao<sup>1</sup>, Shufan Xu<sup>1</sup>, Xun Zhuang<sup>1</sup>,  
Yulong Lian<sup>1</sup>, Yihua Lu<sup>1</sup>, Lei Zhang<sup>1</sup>, Tian Tian<sup>1</sup>, Jiahua Cui<sup>1</sup>, Guangyu Tian<sup>4,#</sup>, Minjie  
Chu<sup>1,#</sup>

<sup>1</sup>Department of Epidemiology, School of Public Health, Nantong University, Nantong, Jiangsu, China

<sup>2</sup>Affiliated Nantong Hospital of Shanghai University (The Sixth People's Hospital of Nantong), Nantong, Jiangsu, China

<sup>3</sup>Department of nutrition, Hai 'an City People's Hospital, Nantong, Jiangsu, China

<sup>4</sup>Department of Oncology, Jiangdu People's Hospital of Yangzhou, Yangzhou, Jiangsu, China

<sup>#</sup>Correspondence:

Minjie Chu

Department of Epidemiology, School of Public Health, Nantong University, Nantong,

Jiangsu, China, 226019

E-mail: [chuminjie@ntu.edu.cn](mailto:chuminjie@ntu.edu.cn)

Guangyu Tian

Department of Oncology, Jiangdu People's Hospital of Yangzhou, Yangzhou, Jiangsu,

China, 225202

E-mail: [jdryzlzx@hotmail.com](mailto:jdryzlzx@hotmail.com)

The authors have withdrawn their manuscript owing to adjustments have been made to the content. Therefore, the authors do not wish this work to be cited as reference for the project. If you have any questions, please contact the corresponding author.
